# Supplementary material for: Primary Preclinical and Clinical Evaluation of 68Ga-DOTA-TMVP1 as a Novel VEGFR-3 PET Imaging Radiotracer in Gynecological Cancer
Source: Oxford University Press journal article supplement (doi:10.1158/1078-0432.ccr-19-1845), 2019-12-16
Supplement: 10780432ccr191845-sup-223530_4_supp_5939212_q1zwzs.docx [file 10780432ccr191845-sup-223530_4_supp_5939212_q1zwzs.docx]

**Supplementary Fig.S1.** The expression of VEGFR-3 detected by IF (A) and western blot (B) in LEC, LEC(shVEGFR-3) and HUVECs.

**Supplementary Fig. S2.** The saturation binding curve using the LECs with 1-40 nM of68Ga-DOTA-TMVP1.
